# Supplementary material
Source: Royal Society of Chemistry journal article supplement (doi:10.1039/d5nj05001d)
Supplement: d5nj05001d1.pdf [file d5nj05001d1.pdf]

## Supplementary Material

# Pressure-Induced Enhancement of Proton Conduction across MOF Grain Boundaries

Manni Li, Dongyang Han, Lei Wu, Yian Shi, Kun Zhang<sup>†</sup>

Automotive Engineering Research Institute, Jiangsu University, Zhenjiang, Jiangsu  
212013, People's Republic of China

These authors contributed equally to this work.

<sup>†</sup>Corresponding authors.

E-mail addresses: kunzhang@ujs.edu.cn



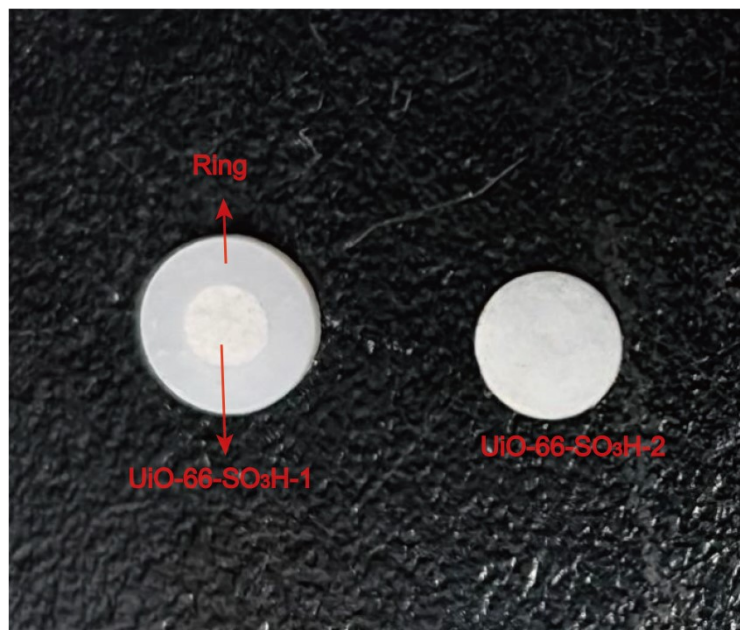

**Fig. S1.** Left: UiO-66-SO<sub>3</sub>H-1 sample; Right: UiO-66-SO<sub>3</sub>H-2 sample.

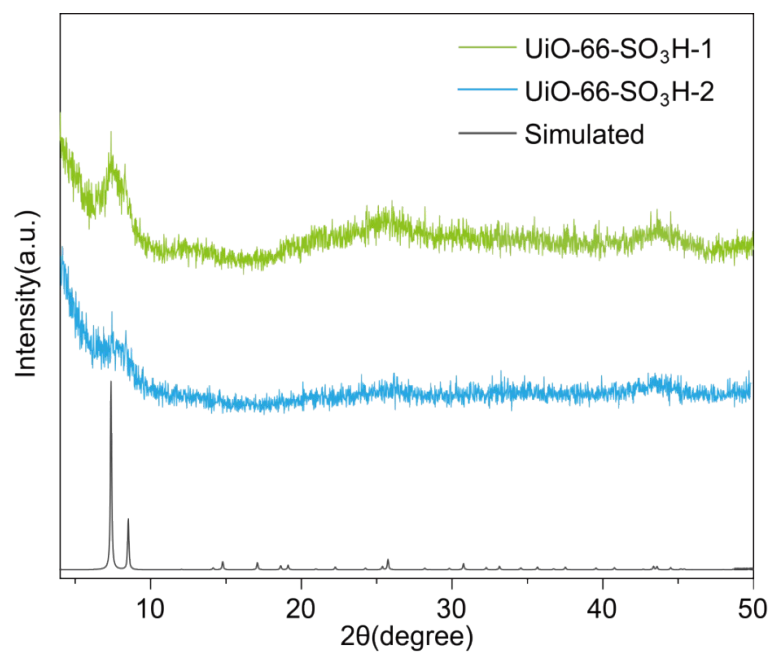

**Fig. S2.** PXRD of UiO-66-SO<sub>3</sub>H-1 and UiO-66-SO<sub>3</sub>H-2.

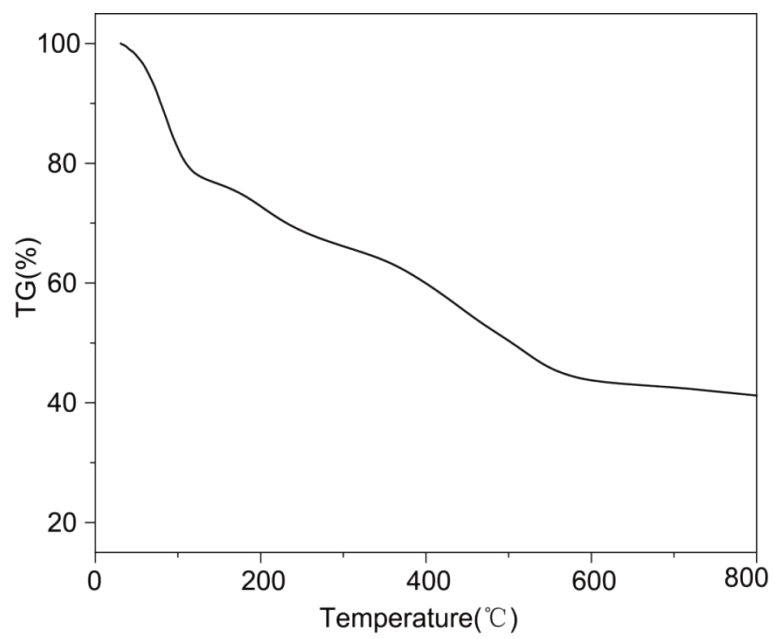

**Fig. S3.** TG of UiO-66-SO<sub>3</sub>H.

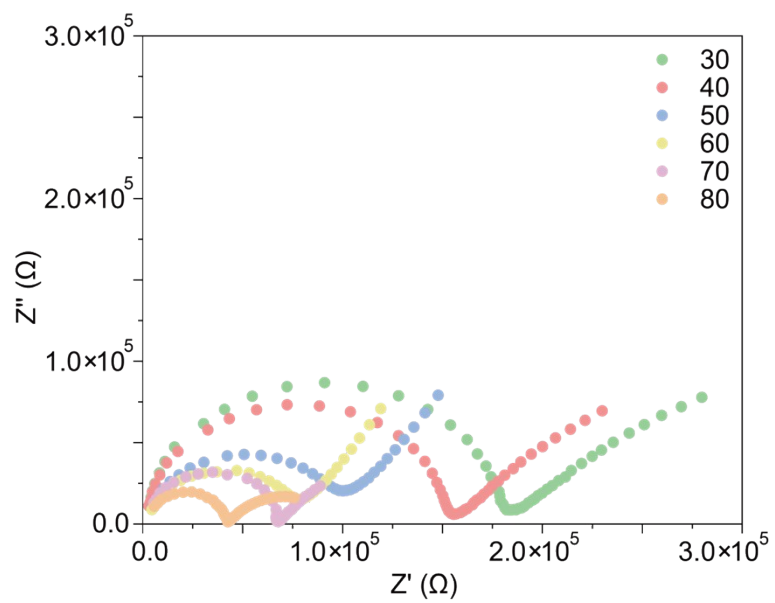

**Fig. S4.** Nyquist plot for UiO-66-SO<sub>3</sub>H-1 at 100% RH versus different temperatures.

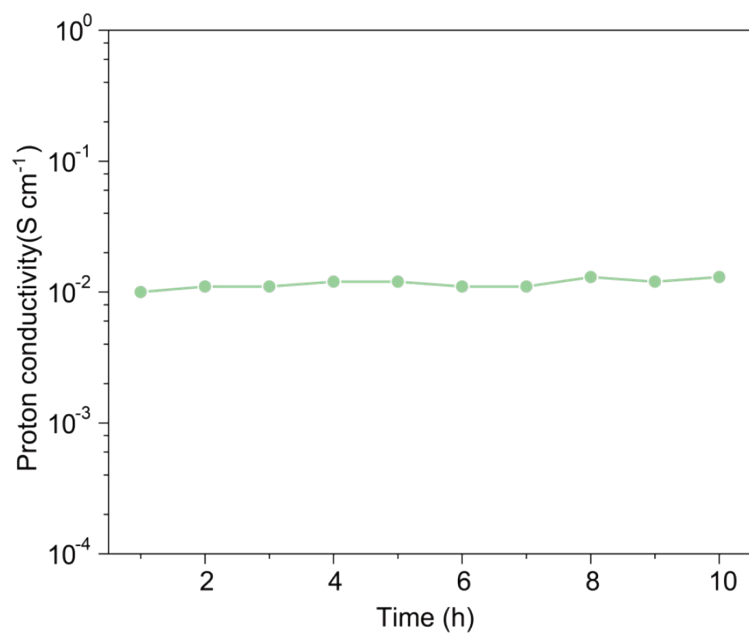

**Fig. S5.** Proton conductivity of UiO-66-SO<sub>3</sub>H-2 versus time at 80 °C and 100% RH.

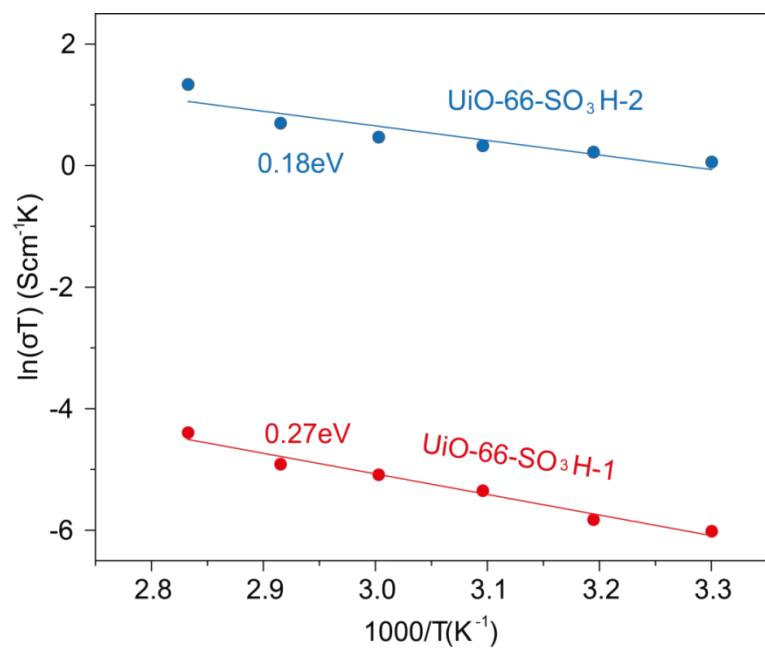

**Fig. S6.** Arrhenius plots of proton conductivity for UiO-66-SO<sub>3</sub>H-1 and UiO-66-SO<sub>3</sub>H-2.

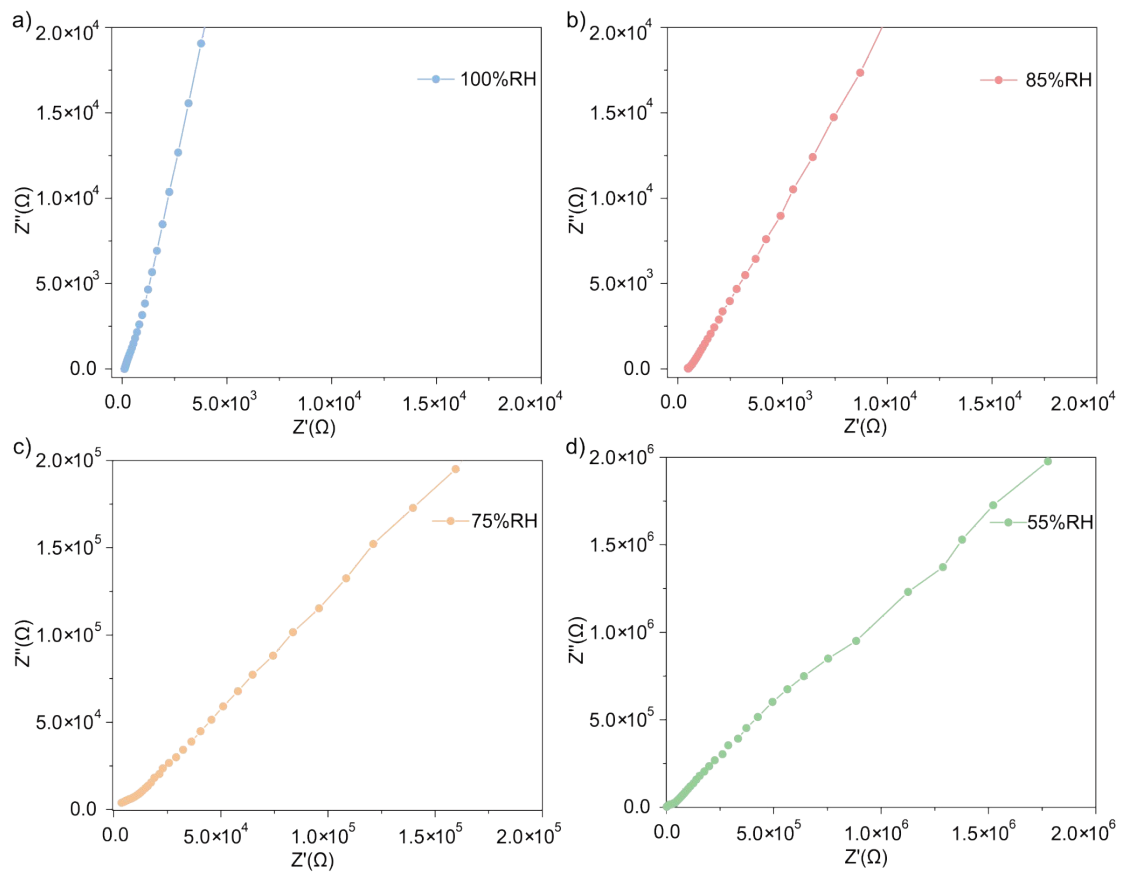

**Fig. S7.** Nyquist plot for UiO-66-SO<sub>3</sub>H-2 at 30°C versus different RHs.

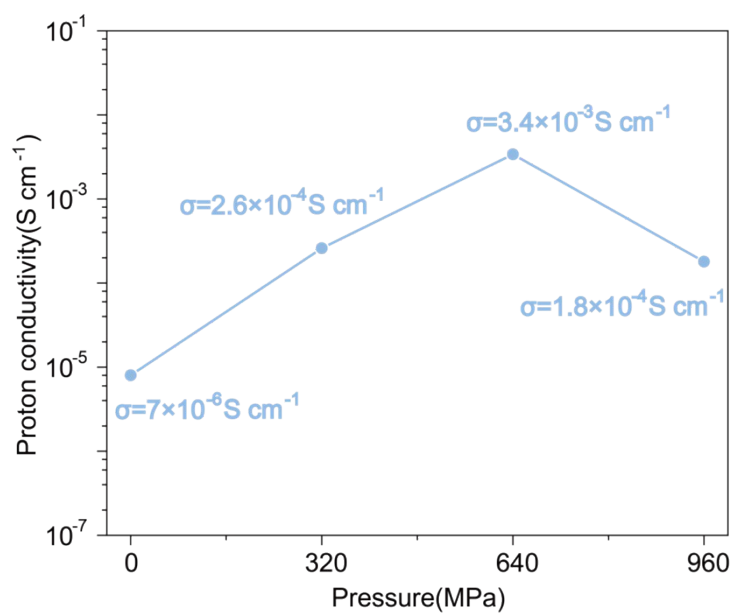

**Fig. S8.** Proton conductivity of UiO-66-SO<sub>3</sub>H pellets as a function of applied pressure.

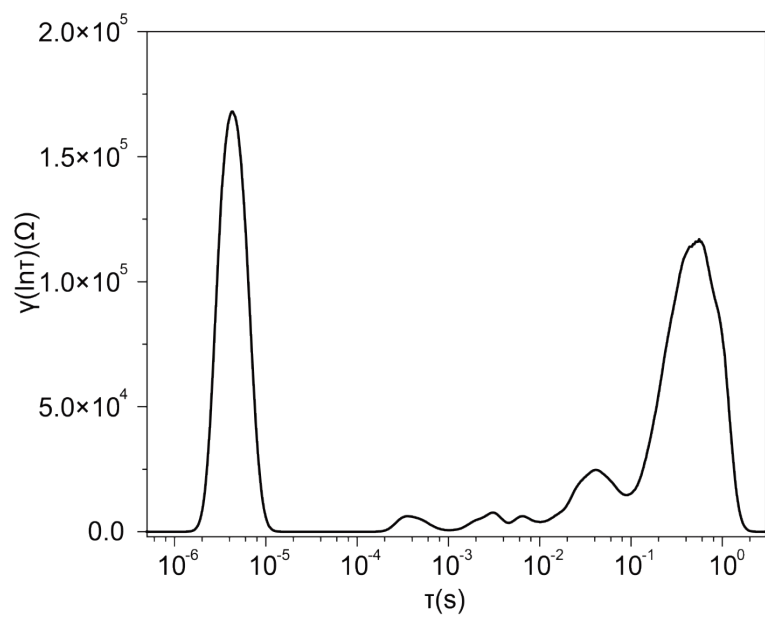

**Fig. S9.** DRT diagram of UiO-66-SO<sub>3</sub>H-1 at 40°C.

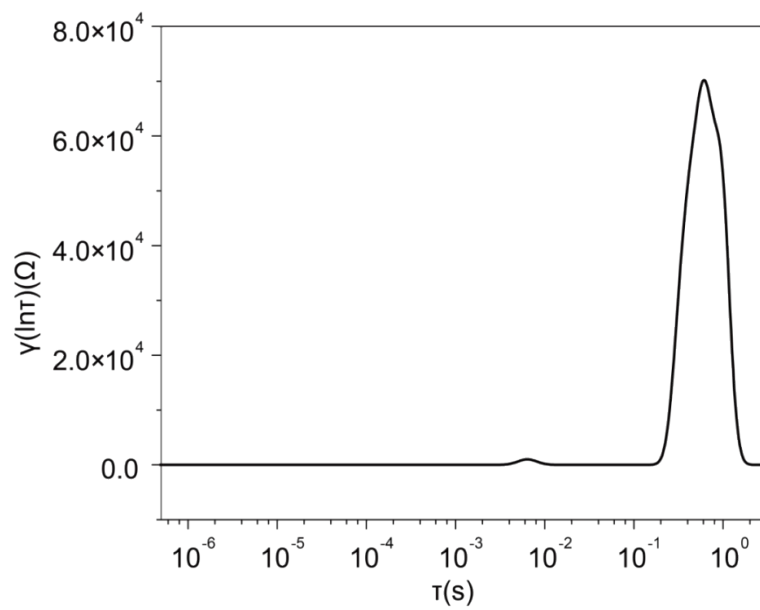

**Fig. S10.** DRT diagram of UiO-66-SO<sub>3</sub>H-2 at 40°C.

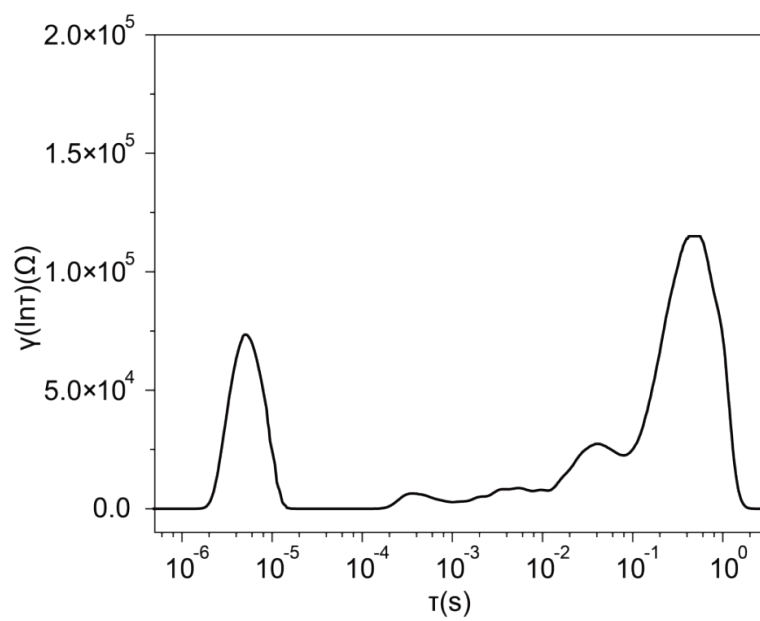

**Fig. S11.** DRT diagram of UiO-66-SO<sub>3</sub>H-1 at 50°C.

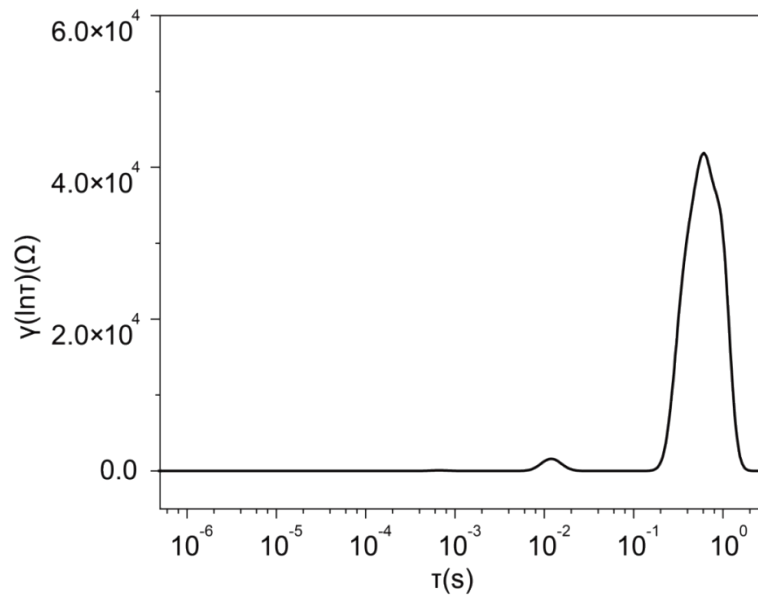

**Fig. S12.** DRT diagram of UiO-66-SO<sub>3</sub>H-2 at 50°C.

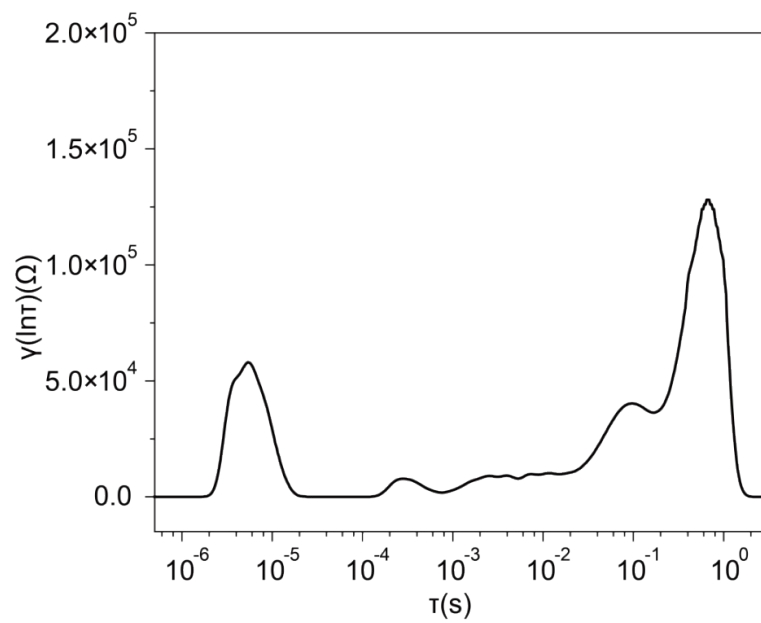

**Fig. S13.** DRT diagram of UiO-66-SO<sub>3</sub>H-1 at 60°C.

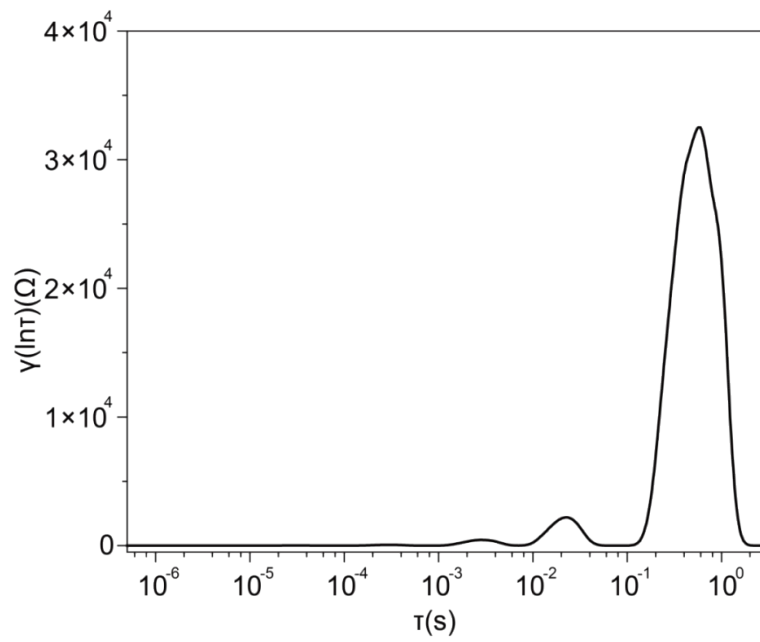

**Fig. S14.** DRT diagram of UiO-66-SO<sub>3</sub>H-2 at 60°C.

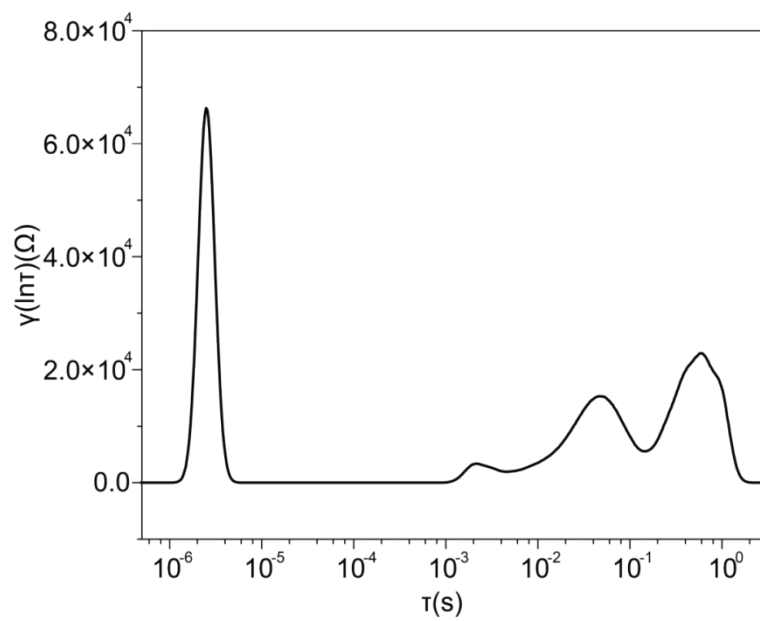

**Fig. S15.** DRT diagram of UiO-66-SO<sub>3</sub>H-1 at 70°C.

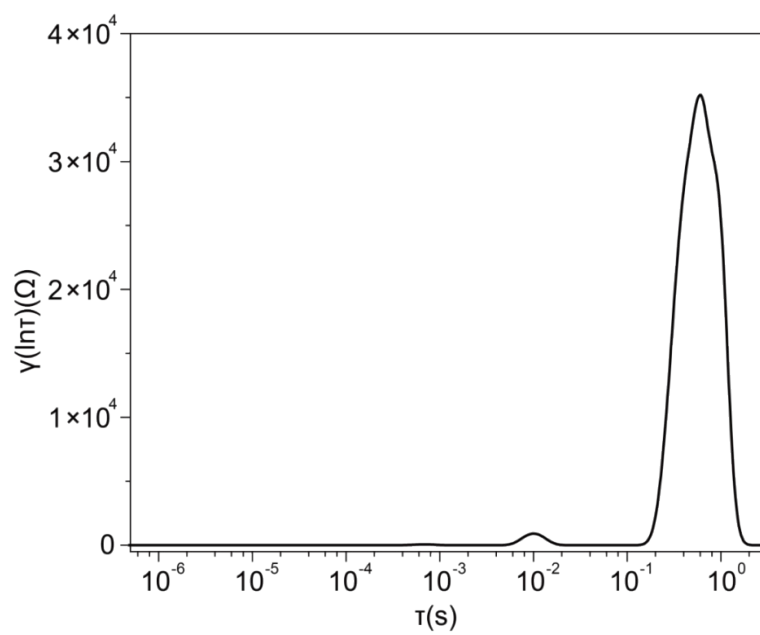

**Fig. S16.** DRT diagram of UiO-66-SO<sub>3</sub>H-2 at 70°C.

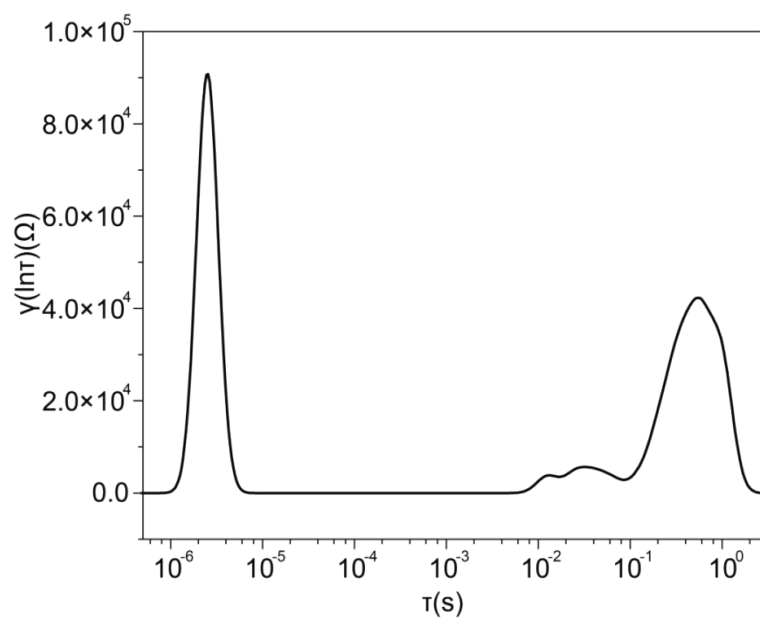

**Fig. S17.** DRT diagram of UiO-66-SO<sub>3</sub>H-1 at 80°C.

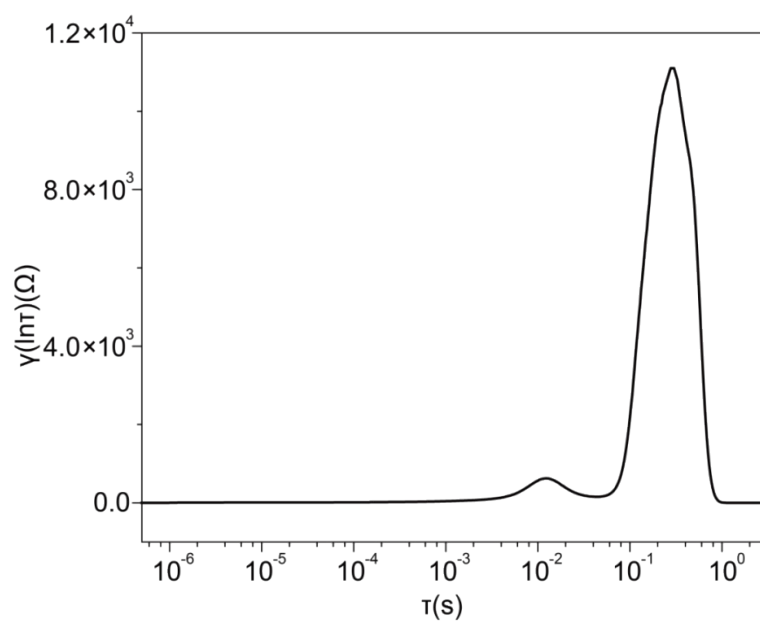

**Fig. S18.** DRT diagram of UiO-66-SO<sub>3</sub>H-2 at 80°C.

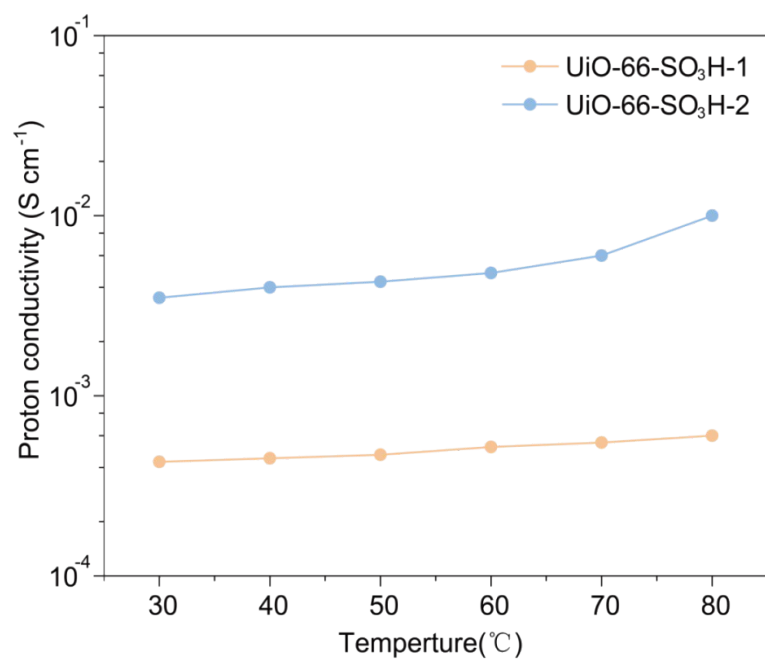

**Fig. S19.** Comparison of bulk proton conductivity among UiO-66-SO<sub>3</sub>H-1 and UiO-66-SO<sub>3</sub>H-2.

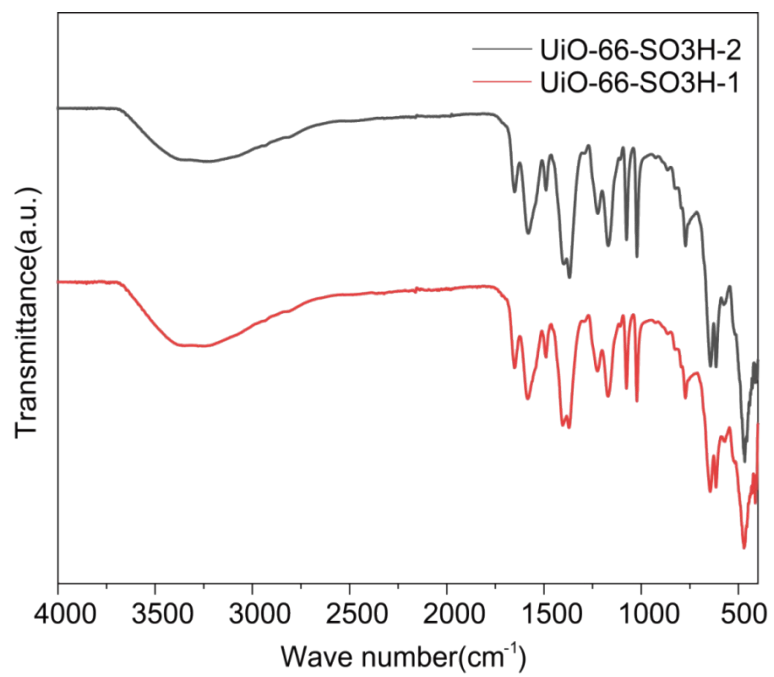

**Fig. S20.** FT-IR spectra of UiO-66-SO<sub>3</sub>H-1 and UiO-66-SO<sub>3</sub>H-2.

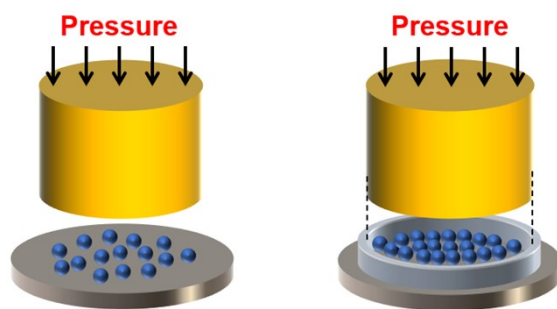

**Fig. S21.** Schematic comparison of the preparation protocols for UiO-66-SO<sub>3</sub>H-3 (left) and UiO-66-SO<sub>3</sub>H-2 (right).

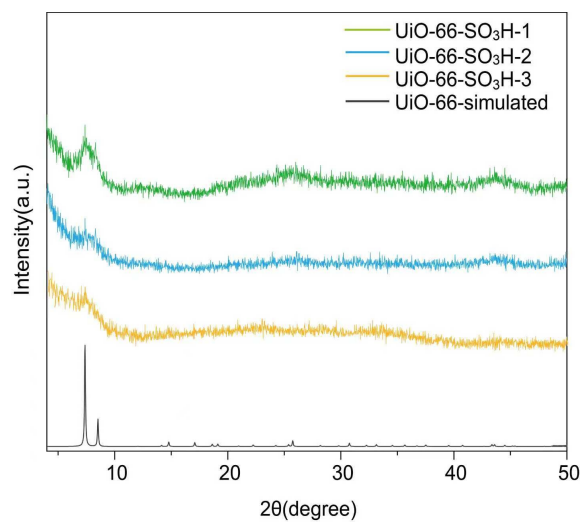

**Fig. S22.** PXRD of the three samples.

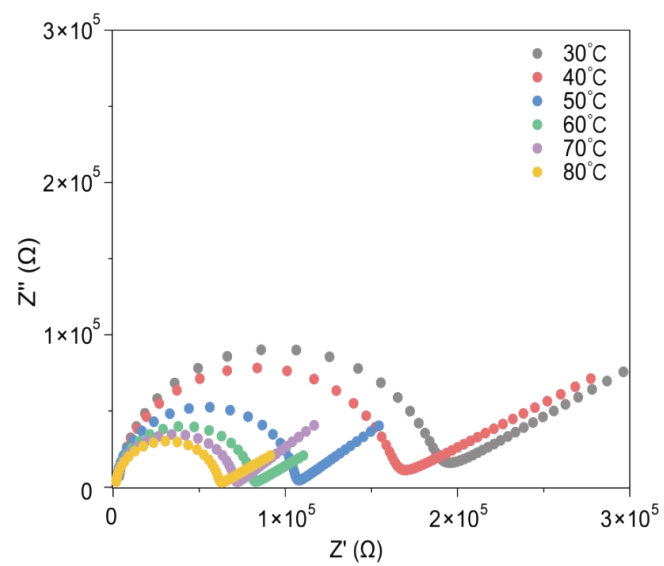

**Fig. S23.** Nyquist plot for UiO-66-SO<sub>3</sub>H-3 at 100% RH versus different temperatures.

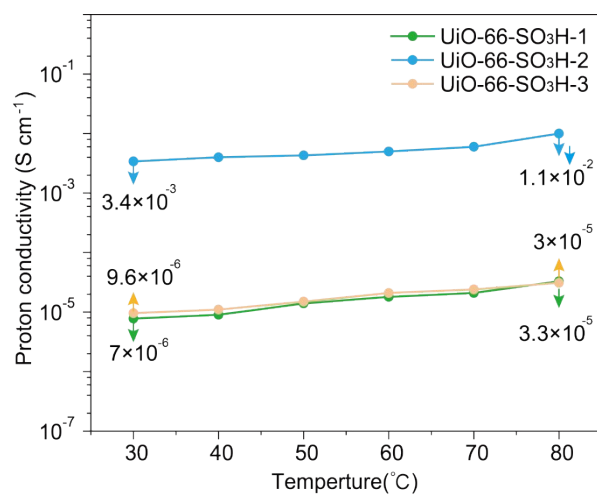

**Fig. S24.** Proton conductivity of the three samples.

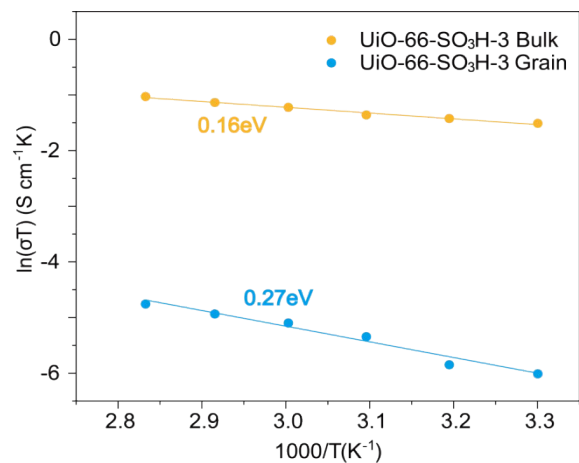

**Fig. S25.** Arrhenius plots of proton conductivity for UiO-66-SO<sub>3</sub>H-3 bulk and grain boundary part.

**Table 1.** Proton conductivity of other MOFs.

| Compounds                                                                            | Conductivity (S cm <sup>-1</sup> ) | Conditions       |
|--------------------------------------------------------------------------------------|------------------------------------|------------------|
| UiO-66-SO <sub>3</sub> H-2                                                           | 1.13×10 <sup>-2</sup>              | T = 80°C, 100%RH |
| MIL-101-SO <sub>3</sub> H                                                            | 1.16 × 10 <sup>-2</sup>            | T = 80°C, 100%RH |
| CUST-861                                                                             | 2.96×10 <sup>-2</sup>              | T =90°C, 98%RH   |
| FDM-151                                                                              | 1.1×10 <sup>-2</sup>               | T =95°C, 100%RH  |
| MOF-bpe                                                                              | 1.95×10 <sup>-2</sup>              | T=95 °C, 100% RH |
| MOF-bpy                                                                              | 2.6×10 <sup>-2</sup>               | T=95 °C, 100% RH |
| MOP-1@DUT-68                                                                         | 7.58×10 <sup>-3</sup>              | T=80 °C, 98% RH  |
| MIP-202(Zr)                                                                          | 1.1×10 <sup>-2</sup>               | T=90 °C, 95% RH  |
| Im@MOF-808                                                                           | 3.45×10 <sup>-2</sup>              | T=65°C, 98% RH   |
| DUT-67(Zr)                                                                           | 2.98×10 <sup>-3</sup>              | T=100°C, 98% RH  |
| 60-UiO-66-1.8                                                                        | 3×10 <sup>-2</sup>                 | T=100°C, 98% RH  |
| ZrP-3                                                                                | 1.91×10 <sup>-2</sup>              | T=90 °C, 95% RH  |
| MOF-808-IMDC                                                                         | 1.11×10 <sup>-2</sup>              | T=80°C, 98% RH   |
| YCu161                                                                               | 1.84×10 <sup>-3</sup>              | T=90°C, 98% RH   |
| Cu-DSOA                                                                              | 1.9×10 <sup>-3</sup>               | T=85°C, 98% RH   |
| MOG-UiO-66                                                                           | 1.23×10 <sup>-2</sup>              | T=80°C, 75% RH   |
| MOG-MOF-808                                                                          | 3.06×10 <sup>-2</sup>              | T=80°C, 75% RH   |
| Nafion                                                                               | 8.0 × 10 <sup>-2</sup>             | T = 80°C, 50%RH  |
| Zr <sub>6</sub> O <sub>4</sub> (OH) <sub>8</sub> L <sub>4.2</sub> ·xH <sub>2</sub> O | 1.93×10 <sup>-3</sup>              | T=65°C, 95% RH   |

Table S2. The fitting parameters of the Nyquist plots of UiO-66-SO<sub>3</sub>H-1.

| Tem(°C) | R1   | R2     | CPE1-T                  | CPE1-P  | CPE2-T                 | CPE2-P  |
|---------|------|--------|-------------------------|---------|------------------------|---------|
| 30      | 3295 | 178200 | $2.540 \times 10^{-11}$ | 1.013   | $3.522 \times 10^{-6}$ | 0.42821 |
| 40      | 3001 | 147370 | $2.606 \times 10^{-11}$ | 1.011   | $5.495 \times 10^{-6}$ | 0.56792 |
| 50      | 2807 | 93319  | $9.468 \times 10^{-11}$ | 0.93674 | $2.769 \times 10^{-6}$ | 0.87364 |
| 60      | 2682 | 73826  | $1.159 \times 10^{-10}$ | 0.92414 | $8.634 \times 10^{-6}$ | 0.33697 |
| 70      | 2600 | 63587  | $2.499 \times 10^{-11}$ | 1.015   | $3.896 \times 10^{-6}$ | 0.46375 |
| 80      | 2374 | 38168  | $3.462 \times 10^{-11}$ | 0.99999 | $4.137 \times 10^{-6}$ | 0.45731 |

Table S3. The fitting parameters of the Nyquist plots of UiO-66-SO<sub>3</sub>H-2.

| Tem(°C) | R     | CPE-T                  | CPE-P   |
|---------|-------|------------------------|---------|
| 30      | 114.3 | $7.641 \times 10^{-6}$ | 0.83685 |
| 40      | 99.21 | $1.735 \times 10^{-5}$ | 0.71624 |
| 50      | 93.15 | $1.649 \times 10^{-5}$ | 0.78415 |
| 60      | 83.21 | $1.002 \times 10^{-5}$ | 0.82544 |
| 70      | 68.82 | $1.842 \times 10^{-5}$ | 0.81035 |
| 80      | 35.53 | $8.434 \times 10^{-5}$ | 0.67573 |

Table S4. The fitting parameters of the Nyquist plots of UiO-66-SO<sub>3</sub>H-3.

| Tem(°C) | R1   | R2     | CPE1-T                  | CPE1-P  | CPE2-T                  | CPE2-P  |
|---------|------|--------|-------------------------|---------|-------------------------|---------|
| 30      | 1945 | 145280 | $5.047 \times 10^{-11}$ | 0.99933 | $2.6227 \times 10^{-6}$ | 0.3603  |
| 40      | 1840 | 123830 | $2.772 \times 10^{-11}$ | 0.99349 | $3.529 \times 10^{-6}$  | 0.33709 |
| 50      | 1783 | 96147  | $5.105 \times 10^{-11}$ | 1.012   | $7.043 \times 10^{-6}$  | 0.42861 |
| 60      | 1602 | 67228  | $8.126 \times 10^{-10}$ | 0.89714 | $9.121 \times 10^{-6}$  | 0.29087 |
| 70      | 1512 | 57664  | $7.020 \times 10^{-11}$ | 1.009   | $6.999 \times 10^{-6}$  | 0.44958 |
| 80      | 1400 | 45221  | $9.483 \times 10^{-11}$ | 1.014   | $1.338 \times 10^{-5}$  | 0.36942 |
